# Supplementary material
Source: PubMed Central journal article supplement (PMC2727263)
Supplement: kwn123_1.pdf [file kwn123_1.pdf]

Appendix Table 1. Mortality from heart disease by socio-demographic characteristics for non-Hispanic white and black adults aged 25 years and older in the 1986-2000 NHIS linked mortality files, n = 802,387.

|                       | Public-use |            | Restricted-use |            |
|-----------------------|------------|------------|----------------|------------|
|                       | HR†        | 95% CI†    | HR†            | 95% CI†    |
| Age in years          | 1.10       | 1.10, 1.10 | 1.10           | 1.10, 1.11 |
| Sex                   |            |            |                |            |
| Women                 | 1.00       |            | 1.00           |            |
| Men                   | 1.89       | 1.85, 1.94 | 1.91           | 1.87, 1.96 |
| Race/Ethnicity        |            |            |                |            |
| non-Hispanic white    | 1.00       |            | 1.00           |            |
| non-Hispanic black    | 1.14       | 1.10, 1.19 | 1.13           | 1.08, 1.17 |
| Marital status        |            |            |                |            |
| Married               | 1.00       |            | 1.00           |            |
| Widowed               | 1.34       | 1.30, 1.38 | 1.34           | 1.30, 1.38 |
| Divorced/separated    | 1.39       | 1.33, 1.46 | 1.40           | 1.34, 1.47 |
| Never married         | 1.50       | 1.42, 1.58 | 1.48           | 1.40, 1.56 |
| Education level       |            |            |                |            |
| Less than high school | 1.54       | 1.50, 1.59 | 1.56           | 1.51, 1.61 |
| High school/GED       | 1.23       | 1.19, 1.26 | 1.25           | 1.21, 1.29 |
| More than high school | 1.00       |            | 1.00           |            |
| Region                |            |            |                |            |
| Northeast             | 1.04       | 1.00, 1.09 | 1.05           | 1.01, 1.09 |
| Midwest               | 1.03       | 0.99, 1.07 | 1.03           | 0.99, 1.07 |
| South                 | 1.08       | 1.03, 1.12 | 1.09           | 1.04, 1.13 |
| West                  | 1.00       |            | 1.00           |            |

\*NHIS, National Health Interview Survey. Mortality follow-up through December 31, 2002.

†HR, hazard ratio; CI, confidence interval. Estimated from a Cox proportional hazards model.

Appendix Table 2. Mortality from ischemic heart disease by socio-demographic characteristics for non-Hispanic white and black adults aged 25 years and older in the 1986-2000 NHIS linked mortality files, n = 802,387.

|                       | Public-use |            | Restricted-use |            |
|-----------------------|------------|------------|----------------|------------|
|                       | HR†        | 95% CI†    | HR†            | 95% CI†    |
| Age in years          | 1.09       | 1.09, 1.09 | 1.09           | 1.09, 1.10 |
| Sex                   |            |            |                |            |
| Women                 | 1.00       |            | 1.00           |            |
| Men                   | 2.11       | 2.02, 2.21 | 2.15           | 2.05, 2.25 |
| Race/Ethnicity        |            |            |                |            |
| non-Hispanic white    | 1.00       |            | 1.00           |            |
| non-Hispanic black    | 0.92       | 0.85, 0.98 | 0.90           | 0.83, 0.96 |
| Marital status        |            |            |                |            |
| Married               | 1.00       |            | 1.00           |            |
| Widowed               | 1.24       | 1.18, 1.32 | 1.25           | 1.18, 1.32 |
| Divorced/separated    | 1.34       | 1.25, 1.45 | 1.34           | 1.24, 1.44 |
| Never married         | 1.27       | 1.16, 1.39 | 1.27           | 1.16, 1.39 |
| Education level       |            |            |                |            |
| Less than high school | 1.71       | 1.61, 1.82 | 1.74           | 1.63, 1.85 |
| High school/GED       | 1.30       | 1.23, 1.38 | 1.32           | 1.24, 1.40 |
| More than high school | 1.00       |            | 1.00           |            |
| Region                |            |            |                |            |
| Northeast             | 1.13       | 1.06, 1.22 | 1.13           | 1.05, 1.21 |
| Midwest               | 1.22       | 1.14, 1.32 | 1.21           | 1.13, 1.31 |
| South                 | 1.35       | 1.25, 1.45 | 1.36           | 1.26, 1.46 |
| West                  | 1.00       |            | 1.00           |            |

\*NHIS, National Health Interview Survey. Mortality follow-up through December 31, 2002.

†HR, hazard ratio; CI, confidence interval. Estimated from a Cox proportional hazards model.

Appendix Table 3. Mortality from lung cancer by socio-demographic characteristics for non-Hispanic white and black adults aged 25 years and older in the 1986-2000 NHIS linked mortality files, n = 802,387.

|                       | Public-use |            | Restricted-use |            |
|-----------------------|------------|------------|----------------|------------|
|                       | HR†        | 95% CI†    | HR†            | 95% CI†    |
| Age in years          | 1.07       | 1.07, 1.07 | 1.07           | 1.07, 1.07 |
| Sex                   |            |            |                |            |
| Women                 | 1.00       |            | 1.00           |            |
| Men                   | 2.17       | 2.06, 2.28 | 2.19           | 2.09, 2.31 |
| Race/Ethnicity        |            |            |                |            |
| non-Hispanic white    | 1.00       |            | 1.00           |            |
| non-Hispanic black    | 1.03       | 0.96, 1.12 | 0.97           | 0.90, 1.06 |
| Marital status        |            |            |                |            |
| Married               | 1.00       |            | 1.00           |            |
| Widowed               | 0.88       | 0.82, 0.95 | 0.90           | 0.84, 0.97 |
| Divorced/separated    | 1.56       | 1.45, 1.69 | 1.53           | 1.42, 1.66 |
| Never married         | 0.86       | 0.77, 0.96 | 0.79           | 0.70, 0.89 |
| Education level       |            |            |                |            |
| Less than high school | 1.85       | 1.73, 1.98 | 1.92           | 1.79, 2.06 |
| High school/GED       | 1.47       | 1.38, 1.57 | 1.54           | 1.44, 1.65 |
| More than high school | 1.00       |            | 1.00           |            |
| Region                |            |            |                |            |
| Northeast             | 1.01       | 0.93, 1.10 | 1.02           | 0.93, 1.10 |
| Midwest               | 1.02       | 0.94, 1.11 | 1.01           | 0.93, 1.10 |
| South                 | 1.17       | 1.08, 1.27 | 1.19           | 1.10, 1.29 |
| West                  | 1.00       |            | 1.00           |            |

\*NHIS, National Health Interview Survey. Mortality follow-up through December 31, 2002.

†HR, hazard ratio; CI, confidence interval. Estimated from a Cox proportional hazards model.

Appendix Table 4. Mortality from colorectal cancer by socio-demographic characteristics for non-Hispanic white and black adults aged 25 years and older in the 1986-2000 NHIS linked mortality files, n = 802,387.

|                       | Public-use |            | Restricted-use |            |
|-----------------------|------------|------------|----------------|------------|
|                       | HR†        | 95% CI†    | HR†            | 95% CI†    |
| Age in years          | 1.08       | 1.08, 1.09 | 1.08           | 1.08, 1.09 |
| Sex                   |            |            |                |            |
| Women                 | 1.00       |            | 1.00           |            |
| Men                   | 1.50       | 1.38, 1.63 | 1.53           | 1.41, 1.66 |
| Race/Ethnicity        |            |            |                |            |
| non-Hispanic white    | 1.00       |            | 1.00           |            |
| non-Hispanic black    | 1.37       | 1.22, 1.53 | 1.39           | 1.25, 1.56 |
| Marital status        |            |            |                |            |
| Married               | 1.00       |            | 1.00           |            |
| Widowed               | 0.92       | 0.83, 1.02 | 0.94           | 0.85, 1.05 |
| Divorced/separated    | 1.21       | 1.04, 1.39 | 1.22           | 1.06, 1.41 |
| Never married         | 1.24       | 1.04, 1.48 | 1.27           | 1.06, 1.52 |
| Education level       |            |            |                |            |
| Less than high school | 1.39       | 1.25, 1.55 | 1.39           | 1.25, 1.55 |
| High school/GED       | 1.33       | 1.21, 1.47 | 1.31           | 1.19, 1.45 |
| More than high school | 1.00       |            | 1.00           |            |
| Region                |            |            |                |            |
| Northeast             | 1.37       | 1.21, 1.55 | 1.36           | 1.20, 1.54 |
| Midwest               | 1.21       | 1.07, 1.37 | 1.21           | 1.07, 1.37 |
| South                 | 1.10       | 0.98, 1.24 | 1.09           | 0.96, 1.23 |
| West                  | 1.00       |            | 1.00           |            |

\*NHIS, National Health Interview Survey. Mortality follow-up through December 31, 2002.

†HR, hazard ratio; CI, confidence interval. Estimated from a Cox proportional hazards model.

Appendix Table 5. Mortality from breast cancer by socio-demographic characteristics for non-Hispanic white and black women aged 25 years and older in the 1986-2000 NHIS linked mortality files, n =432,252 .

|                       | Public-use |            | Restricted-use |            |
|-----------------------|------------|------------|----------------|------------|
|                       | HR†        | 95% CI†    | HR†            | 95% CI†    |
| Age in years          | 1.05       | 1.04, 1.05 | 1.05           | 1.05, 1.05 |
| Race/Ethnicity        |            |            |                |            |
| non-Hispanic white    | 1.00       |            | 1.00           |            |
| non-Hispanic black    | 1.34       | 1.17, 1.54 | 1.36           | 1.18, 1.57 |
| Marital status        |            |            |                |            |
| Married               | 1.00       |            | 1.00           |            |
| Widowed               | 0.94       | 0.83, 1.07 | 0.94           | 0.83, 1.07 |
| Divorced/separated    | 1.14       | 0.99, 1.31 | 1.11           | 0.96, 1.29 |
| Never married         | 1.10       | 0.91, 1.32 | 1.04           | 0.85, 1.27 |
| Education level       |            |            |                |            |
| Less than high school | 1.02       | 0.90, 1.16 | 1.02           | 0.90, 1.17 |
| High school/GED       | 1.08       | 0.98, 1.20 | 1.11           | 1.00, 1.23 |
| More than high school | 1.00       |            | 1.00           |            |
| Region                |            |            |                |            |
| Northeast             | 1.09       | 0.92, 1.28 | 1.10           | 0.93, 1.29 |
| Midwest               | 1.01       | 0.87, 1.17 | 1.01           | 0.87, 1.17 |
| South                 | 0.93       | 0.80, 1.08 | 0.95           | 0.82, 1.11 |
| West                  | 1.00       |            | 1.00           |            |

\*NHIS, National Health Interview Survey. Mortality follow-up through December 31, 2002.

†HR, hazard ratio; CI, confidence interval. Estimated from a Cox proportional hazards model.

Appendix Table 6. Mortality from prostate cancer by socio-demographic characteristics for non-Hispanic white and black men aged 25 years and older in the 1986-2000 NHIS linked mortality files, n =370,135.

|                       | Public-use |            | Restricted-use |            |
|-----------------------|------------|------------|----------------|------------|
|                       | HR†        | 95% CI†    | HR†            | 95% CI†    |
| Age in years          | 1.14       | 1.13, 1.14 | 1.14           | 1.14, 1.15 |
| Race/Ethnicity        |            |            |                |            |
| non-Hispanic white    | 1.00       |            | 1.00           |            |
| non-Hispanic black    | 2.49       | 2.15, 2.88 | 2.51           | 2.16, 2.90 |
| Marital status        |            |            |                |            |
| Married               | 1.00       |            | 1.00           |            |
| Widowed               | 0.87       | 0.74, 1.03 | 0.88           | 0.74, 1.04 |
| Divorced/separated    | 0.99       | 0.78, 1.26 | 0.99           | 0.78, 1.25 |
| Never married         | 0.99       | 0.75, 1.30 | 1.02           | 0.78, 1.34 |
| Education level       |            |            |                |            |
| Less than high school | 1.02       | 0.89, 1.17 | 1.04           | 0.91, 1.19 |
| High school/GED       | 1.04       | 0.90, 1.20 | 1.04           | 0.90, 1.19 |
| More than high school | 1.00       |            | 1.00           |            |
| Region                |            |            |                |            |
| Northeast             | 1.00       | 0.84, 1.18 | 0.99           | 0.83, 1.18 |
| Midwest               | 1.03       | 0.88, 1.21 | 1.04           | 0.88, 1.22 |
| South                 | 1.01       | 0.86, 1.19 | 1.01           | 0.86, 1.18 |
| West                  | 1.00       |            | 1.00           |            |

\*NHIS, National Health Interview Survey. Mortality follow-up through December 31, 2002.

†HR, hazard ratio; CI, confidence interval. Estimated from a Cox proportional hazards model.

Appendix Table 7. Mortality from cerebrovascular disease by socio-demographic characteristics for non-Hispanic white and black adults aged 25 years and older in the 1986-2000 NHIS linked mortality files, n = 802,387.

|                       | Public-use |            | Restricted-use |            |
|-----------------------|------------|------------|----------------|------------|
|                       | HR†        | 95% CI†    | HR†            | 95% CI†    |
| Age in years          | 1.12       | 1.12, 1.12 | 1.12           | 1.12, 1.13 |
| Sex                   |            |            |                |            |
| Women                 | 1.00       |            | 1.00           |            |
| Men                   | 1.17       | 1.11, 1.23 | 1.19           | 1.13, 1.26 |
| Race/Ethnicity        |            |            |                |            |
| non-Hispanic white    | 1.00       |            | 1.00           |            |
| non-Hispanic black    | 1.22       | 1.14, 1.32 | 1.24           | 1.15, 1.33 |
| Marital status        |            |            |                |            |
| Married               | 1.00       |            | 1.00           |            |
| Widowed               | 1.13       | 1.06, 1.20 | 1.14           | 1.07, 1.21 |
| Divorced/separated    | 1.30       | 1.16, 1.45 | 1.30           | 1.17, 1.45 |
| Never married         | 1.21       | 1.08, 1.35 | 1.22           | 1.09, 1.36 |
| Education level       |            |            |                |            |
| Less than high school | 1.31       | 1.22, 1.40 | 1.31           | 1.22, 1.40 |
| High school/GED       | 1.18       | 1.10, 1.27 | 1.18           | 1.10, 1.26 |
| More than high school | 1.00       |            | 1.00           |            |
| Region                |            |            |                |            |
| Northeast             | 0.75       | 0.69, 0.82 | 0.76           | 0.70, 0.83 |
| Midwest               | 0.95       | 0.88, 1.03 | 0.96           | 0.88, 1.04 |
| South                 | 0.96       | 0.88, 1.04 | 0.95           | 0.88, 1.03 |
| West                  | 1.00       |            | 1.00           |            |

\*NHIS, National Health Interview Survey. Mortality follow-up through December 31, 2002.

†HR, hazard ratio; CI, confidence interval. Estimated from a Cox proportional hazards model.

Appendix Table 8. Mortality from diabetes by socio-demographic characteristics for non-Hispanic white and black adults aged 25 years and older in the 1986-2000 NHIS linked mortality files, n = 802,387.

|                       | Public-use |            | Restricted-use |            |
|-----------------------|------------|------------|----------------|------------|
|                       | HR†        | 95% CI†    | HR†            | 95% CI†    |
| Age in years          | 1.08       | 1.07, 1.08 | 1.08           | 1.07, 1.08 |
| Sex                   |            |            |                |            |
| Women                 | 1.00       |            | 1.00           |            |
| Men                   | 1.33       | 1.21, 1.46 | 1.33           | 1.21, 1.46 |
| Race/Ethnicity        |            |            |                |            |
| non-Hispanic white    | 1.00       |            | 1.00           |            |
| non-Hispanic black    | 1.86       | 1.68, 2.06 | 1.87           | 1.70, 2.07 |
| Marital status        |            |            |                |            |
| Married               | 1.00       |            | 1.00           |            |
| Widowed               | 1.26       | 1.13, 1.41 | 1.27           | 1.14, 1.41 |
| Divorced/separated    | 1.41       | 1.24, 1.61 | 1.42           | 1.25, 1.62 |
| Never married         | 1.59       | 1.37, 1.85 | 1.60           | 1.38, 1.86 |
| Education level       |            |            |                |            |
| Less than high school | 1.79       | 1.59, 2.02 | 1.80           | 1.60, 2.03 |
| High school/GED       | 1.47       | 1.31, 1.65 | 1.46           | 1.30, 1.63 |
| More than high school | 1.00       |            | 1.00           |            |
| Region                |            |            |                |            |
| Northeast             | 1.10       | 0.95, 1.28 | 1.10           | 0.95, 1.28 |
| Midwest               | 1.19       | 1.04, 1.37 | 1.20           | 1.05, 1.37 |
| South                 | 1.19       | 1.04, 1.36 | 1.20           | 1.05, 1.37 |
| West                  | 1.00       |            | 1.00           |            |

\*NHIS, National Health Interview Survey. Mortality follow-up through December 31, 2002.

†HR, hazard ratio; CI, confidence interval. Estimated from a Cox proportional hazards model.



Appendix Table 9. Mortality from pneumonia and influenza by socio-demographic characteristics for non-Hispanic white and black adults aged 25 years and older in the 1986-2000 NHIS linked mortality files, n = 802,387.

|                       | Public-use |            | Restricted-use |            |
|-----------------------|------------|------------|----------------|------------|
|                       | HR†        | 95% CI†    | HR†            | 95% CI†    |
| Age in years          | 1.14       | 1.13, 1.14 | 1.14           | 1.13, 1.14 |
| Sex                   |            |            |                |            |
| Women                 | 1.00       |            | 1.00           |            |
| Men                   | 1.87       | 1.72, 2.03 | 1.92           | 1.76, 2.09 |
| Race/Ethnicity        |            |            |                |            |
| non-Hispanic white    | 1.00       |            | 1.00           |            |
| non-Hispanic black    | 0.97       | 0.85, 1.11 | 0.99           | 0.87, 1.13 |
| Marital status        |            |            |                |            |
| Married               | 1.00       |            | 1.00           |            |
| Widowed               | 1.28       | 1.16, 1.41 | 1.30           | 1.18, 1.42 |
| Divorced/separated    | 1.39       | 1.17, 1.64 | 1.40           | 1.19, 1.65 |
| Never married         | 1.93       | 1.62, 2.30 | 1.99           | 1.67, 2.36 |
| Education level       |            |            |                |            |
| Less than high school | 1.53       | 1.38, 1.70 | 1.55           | 1.40, 1.72 |
| High school/GED       | 1.29       | 1.16, 1.44 | 1.29           | 1.16, 1.44 |
| More than high school | 1.00       |            | 1.00           |            |
| Region                |            |            |                |            |
| Northeast             | 0.71       | 0.63, 0.80 | 0.71           | 0.63, 0.80 |
| Midwest               | 0.75       | 0.67, 0.85 | 0.76           | 0.67, 0.85 |
| South                 | 0.82       | 0.74, 0.92 | 0.82           | 0.74, 0.92 |
| West                  | 1.00       |            | 1.00           |            |

\*NHIS, National Health Interview Survey. Mortality follow-up through December 31, 2002.

†HR, hazard ratio; CI, confidence interval. Estimated from a Cox proportional hazards model.

Appendix Table 10. Mortality from chronic liver disease and cirrhosis by socio-demographic characteristics for non-Hispanic white and black adults aged 25 years and older in the 1986-2000 NHIS linked mortality files, n = 802,387.

|                       | Public-use |            | Restricted-use |            |
|-----------------------|------------|------------|----------------|------------|
|                       | HR†        | 95% CI†    | HR†            | 95% CI†    |
| Age in years          | 1.04       | 1.04, 1.05 | 1.04           | 1.04,1.05  |
| Sex                   |            |            |                |            |
| Women                 | 1.00       |            | 1.00           |            |
| Men                   | 2.02       | 1.73, 2.35 | 2.01           | 1.74, 2.33 |
| Race/Ethnicity        |            |            |                |            |
| non-Hispanic white    | 1.00       |            | 1.00           |            |
| non-Hispanic black    | 0.97       | 0.78, 1.20 | 1.01           | 0.82, 1.24 |
| Marital status        |            |            |                |            |
| Married               | 1.00       |            | 1.00           |            |
| Widowed               | 1.34       | 1.03, 1.74 | 1.38           | 1.06, 1.80 |
| Divorced/separated    | 2.79       | 2.34, 3.32 | 2.86           | 2.41, 3.40 |
| Never married         | 1.87       | 1.49, 2.35 | 1.95           | 1.56, 2.45 |
| Education level       |            |            |                |            |
| Less than high school | 1.52       | 1.26, 1.84 | 1.50           | 1.24, 1.82 |
| High school/GED       | 1.29       | 1.09, 1.52 | 1.27           | 1.07, 1.50 |
| More than high school | 1.00       |            | 1.00           |            |
| Region                |            |            |                |            |
| Northeast             | 0.77       | 0.61, 0.98 | 0.78           | 0.62, 0.98 |
| Midwest               | 0.71       | 0.58, 0.87 | 0.70           | 0.58, 0.85 |
| South                 | 0.87       | 0.71, 1.06 | 0.87           | 0.72, 1.05 |
| West                  | 1.00       |            | 1.00           |            |

\*NHIS, National Health Interview Survey. Mortality follow-up through December 31, 2002.

†HR, hazard ratio; CI, confidence interval. Estimated from a Cox proportional hazards model.

Appendix Table 11. Mortality from unintentional injury by socio-demographic characteristics for non-Hispanic white and black adults aged 25 years and older in the 1986-2000 NHIS linked mortality files, n = 802,387.

|                       | Public-use |            | Restricted-use |            |
|-----------------------|------------|------------|----------------|------------|
|                       | HR†        | 95% CI†    | HR†            | 95% CI†    |
| Age in years          | 1.03       | 1.03, 1.04 | 1.04           | 1.03, 1.04 |
| Sex                   |            |            |                |            |
| Women                 | 1.00       |            | 1.00           |            |
| Men                   | 2.07       | 1.90, 2.25 | 2.08           | 1.91, 2.26 |
| Race/Ethnicity        |            |            |                |            |
| non-Hispanic white    | 1.00       |            | 1.00           |            |
| non-Hispanic black    | 1.00       | 0.88, 1.13 | 1.03           | 0.91, 1.16 |
| Marital status        |            |            |                |            |
| Married               | 1.00       |            | 1.00           |            |
| Widowed               | 1.63       | 1.43, 1.86 | 1.62           | 1.41, 1.85 |
| Divorced/separated    | 1.58       | 1.39, 1.79 | 1.59           | 1.40, 1.80 |
| Never married         | 1.82       | 1.59, 2.07 | 1.86           | 1.63, 2.12 |
| Education level       |            |            |                |            |
| Less than high school | 1.62       | 1.44, 1.81 | 1.61           | 1.44, 1.80 |
| High school/GED       | 1.33       | 1.20, 1.47 | 1.30           | 1.18, 1.44 |
| More than high school | 1.00       |            | 1.00           |            |
| Region                |            |            |                |            |
| Northeast             | 0.82       | 0.72, 0.93 | 0.82           | 0.72, 0.94 |
| Midwest               | 0.95       | 0.84, 1.09 | 0.95           | 0.83, 1.09 |
| South                 | 1.08       | 0.96, 1.22 | 1.07           | 0.95, 1.21 |
| West                  | 1.00       |            | 1.00           |            |

\*NHIS, National Health Interview Survey. Mortality follow-up through December 31, 2002.

†HR, hazard ratio; CI, confidence interval. Estimated from a Cox proportional hazards model.

Appendix Table 12. Mortality from suicide by socio-demographic characteristics for non-Hispanic white and black adults aged 25 years and older in the 1986-2000 NHIS linked mortality files, n = 802,387.

|                       | Public-use |            | Restricted-use |            |
|-----------------------|------------|------------|----------------|------------|
|                       | HR†        | 95% CI†    | HR†            | 95% CI†    |
| Age in years          | 1.01       | 1.00, 1.01 | 1.01           | 1.00, 1.01 |
| Sex                   |            |            |                |            |
| Women                 | 1.00       |            | 1.00           |            |
| Men                   | 4.29       | 3.60, 5.11 | 4.21           | 3.54, 5.01 |
| Race/Ethnicity        |            |            |                |            |
| non-Hispanic white    | 1.00       |            | 1.00           |            |
| non-Hispanic black    | 0.37       | 0.28, 0.48 | 0.38           | 0.29, 0.50 |
| Marital status        |            |            |                |            |
| Married               | 1.00       |            | 1.00           |            |
| Widowed               | 1.61       | 1.22, 2.13 | 1.67           | 1.27, 2.19 |
| Divorced/separated    | 2.03       | 1.68, 2.46 | 2.04           | 1.70, 2.45 |
| Never married         | 1.94       | 1.56, 2.41 | 1.91           | 1.53, 2.38 |
| Education level       |            |            |                |            |
| Less than high school | 1.39       | 1.15, 1.69 | 1.39           | 1.14, 1.68 |
| High school/GED       | 1.29       | 1.11, 1.50 | 1.28           | 1.11, 1.49 |
| More than high school | 1.00       |            | 1.00           |            |
| Region                |            |            |                |            |
| Northeast             | 0.64       | 0.49, 0.83 | 0.64           | 0.49, 0.82 |
| Midwest               | 0.77       | 0.62, 0.96 | 0.76           | 0.61, 0.96 |
| South                 | 0.92       | 0.74, 1.15 | 0.93           | 0.74, 1.15 |
| West                  | 1.00       |            | 1.00           |            |

\*NHIS, National Health Interview Survey. Mortality follow-up through December 31, 2002.

†HR, hazard ratio; CI, confidence interval. Estimated from a Cox proportional hazards model.
